# Supplementary material
Source: PubMed Central journal article supplement (PMC2586273)
Supplement: M807574200_1.pdf [file M807574200_1.pdf]

# Inagaki et al. Supplementary Figure S1

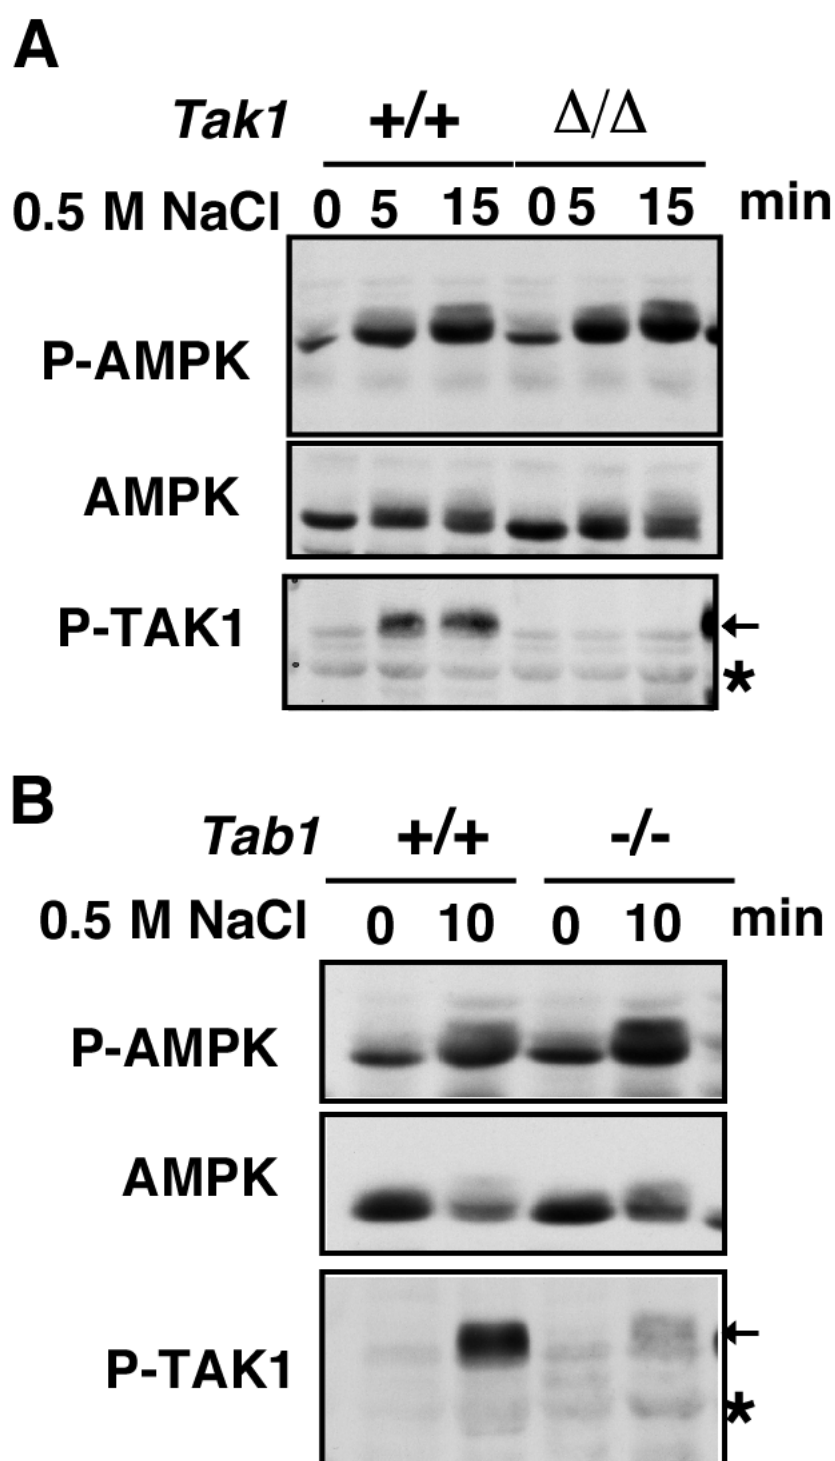

**Figure S1.**

**TAB1 is dispensable for osmotic stress-induced activation of AMPK.**

(A) *Tak1*<sup>+/+</sup> and *Tak1*<sup>Δ/Δ</sup> MEFs were stimulated with 0.5 M NaCl. Activation of AMPK and TAK1 was analyzed by immunoblots.

(B) *Tab1*-control (*+/+*) and *Tab1*-deficient (*-/-*) MEFs were pretested with 125 nM okadaic acid, an inhibitor for type 2A family protein phosphatases, for 4 h to inhibit downregulation of TAK1. Activation of AMPK and TAK1 was analyzed by immunoblots.

Asterisk indicates non-specific bands.

# Inagaki et al. Supplementary Figure S2

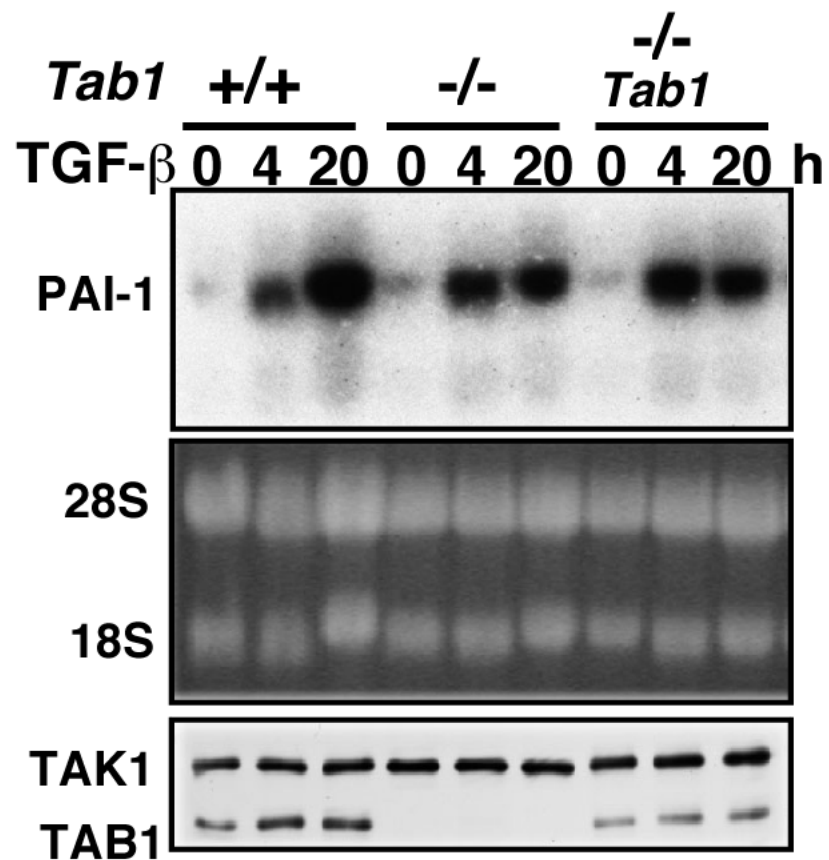

**Figure S2.**

**TAB1 is dispensable for TGF- $\beta$ -induced PAI-1 expression.**

*Tab1*-control (+/+), *Tab1*-deficient (-/-) and *Tab1*-restored (-/- *Tab1*) MEFs were stimulated with 5 ng/ml TGF- $\beta$ . PAI-1 expression was monitored by Northern Blotting. Ribosomal 28S and 18S RNAs are shown as loading control. TAK1 and TAB1 were detected by immunoblotting with anti-TAK1 and anti-TAB1 (bottom panel).
